# Supplementary material for: Validation of Three MicroScan® Antimicrobial Susceptibility Testing Plates Designed for Low-Resource Settings
Source: MDPI journal article supplement (doi:10.3390/diagnostics12092106), 2022-08-30
Supplement: s1 [file s1]

**Table S1.** List of antibiotics or resistance mechanisms tests included onto the different MSF MIC panels as pers WHO AWaRe category and based on the list of essential medicine

| Antibiotic                       | Class                                  | AWaRe Category | MIC POS Panel <sup>1</sup>       |                                | MIC NEG Panel <sup>2</sup>          |                                                     | MIC FAST Panel <sup>3</sup>     |                                |
|----------------------------------|----------------------------------------|----------------|----------------------------------|--------------------------------|-------------------------------------|-----------------------------------------------------|---------------------------------|--------------------------------|
|                                  |                                        |                | <i>Staphylo-</i><br><i>cocci</i> | <i>Entero-</i><br><i>cocci</i> | <i>Enterobac-</i><br><i>terales</i> | <i>Non-Fer-</i><br><i>menting</i><br><i>bacilli</i> | <i>Strepto-</i><br><i>cocci</i> | <i>Haemoph-</i><br><i>ilus</i> |
| Ampicillin                       | Penicillins                            | Access         | X                                | X                              | X                                   |                                                     | X                               |                                |
| Benzylpenicillin                 | Penicillins                            | Access         | X                                |                                |                                     |                                                     | X                               |                                |
| Oxacillin                        | Penicillins                            | Access         | X                                |                                |                                     |                                                     |                                 |                                |
| Amoxicillin/clavulanic Acid      | Beta lactam - beta lactamase inhibitor | Access         |                                  |                                | X                                   |                                                     |                                 |                                |
| Chloramphenicol                  | Amphenicols                            | Access         |                                  |                                | X                                   |                                                     | X                               | X                              |
| Gentamicin                       | Aminoglycosides                        | Access         | X                                |                                | X                                   | X                                                   |                                 |                                |
| Gentamicin (high level)          | Aminoglycosides                        | Access         |                                  | X                              |                                     |                                                     |                                 |                                |
| Amikacin                         | Aminoglycosides                        | Access         | X                                |                                | X                                   | X                                                   |                                 |                                |
| Clindamycin                      | Lincosamides                           | Access         | X                                |                                |                                     |                                                     |                                 |                                |
| Inducible clindamycin resistance | Lincosamides                           | Access         | X                                |                                |                                     |                                                     |                                 |                                |
| Tetracycline                     | Tetracyclines                          | Access         | X                                |                                |                                     |                                                     |                                 |                                |
| Trimethoprim/sulfamethoxazole    | Trimethoprim                           | Access         | X                                |                                | X                                   | X                                                   | X                               | X                              |
| Cefoxitin screen                 | Second-generation cephalosporins       | Watch          | X                                |                                |                                     |                                                     |                                 |                                |
| Ceftazidime                      | Third generation cephalosporins        | Watch          |                                  |                                | X                                   | X                                                   |                                 |                                |
| Ceftriaxone                      | Third generation cephalosporins        | Watch          |                                  |                                | X                                   |                                                     | X                               | X                              |
| ESBL test                        | Third generation cephalosporins        | Watch          |                                  |                                | X                                   | X                                                   |                                 |                                |
| Piperacillin/tazobactam          | Beta lactam - beta lactamase inhibitor | Watch          |                                  |                                | X                                   | X                                                   |                                 |                                |
| Ertapenem                        | Carbapenems                            | Watch          |                                  |                                | X                                   | X                                                   |                                 |                                |
| Imipenem/cilastatin              | Carbapenems                            | Watch          |                                  |                                | X                                   | X                                                   |                                 |                                |
| Meropenem                        | Carbapenems                            | Watch          |                                  |                                | X                                   | X                                                   | X                               | X                              |
| Ciprofloxacin                    | Fluoroquinolones                       | Watch          | X                                | X                              | X                                   | X                                                   |                                 | X                              |
| Levofloxacin                     | Fluoroquinolones                       | Watch          |                                  |                                |                                     |                                                     | X                               | X                              |
| Teicoplanin                      | Glycopeptides                          | Watch          | X                                | X                              |                                     |                                                     |                                 |                                |
| Vancomycin (IV)                  | Glycopeptides                          | Watch          | X                                | X                              |                                     |                                                     | X                               |                                |
| Erythromycin                     | Macrolides                             | Watch          | X                                |                                |                                     |                                                     |                                 |                                |
| Tigecycline                      | Glycylcyclines                         | Reserve        | X                                | X                              |                                     |                                                     |                                 |                                |
| Daptomycin                       | Lipopeptides                           | Reserve        | X                                |                                |                                     |                                                     |                                 |                                |
| Linezolid                        | Oxazolidinones                         | Reserve        | X                                |                                |                                     |                                                     | X                               |                                |
| Fosfomycin (IV)                  | Phosphonics                            | Reserve        | X                                |                                | X                                   |                                                     |                                 |                                |
| Colistin                         | Polymyxins                             | Reserve        |                                  |                                | X                                   | X                                                   |                                 |                                |
| Dalfopristin-quinupristin        | Streptogramins                         | Reserve        | X                                | X                              |                                     |                                                     |                                 |                                |

<sup>1</sup> MicroScan Inducible Clindamycin test is intended to detect inducible resistance for staphylococci with the antimicrobial agent clindamycin. The MicroScan Cefoxitin Screen is intended to determine the susceptibility of Staphylococcus species to the penicillinase-stable beta-lactams. The Cefoxitin Screen uses the 16-20 hour result from a well containing cefoxitin at 4 mcg/mL and growth media, labeled CfxS, and the oxacillin MIC at 16-20 hours..

<sup>2</sup> Trimethoprim, and Trimethoprim/Sulfamethoxazole broth contain thymidine phosphorylase to reduce thymidine levels in the medium. Ceftazidime, cefotaxime, ceftazidime/ clavulanic acid and cefotaxime/clavulanic acid are used to confirm the presence of ESBLs. The confirmation test is a  $\geq 3$  twofold dilution decrease in MICs of suspected organisms to ceftazidime or cefotaxime in the presence of a fixed concentration of clavulanic acid, versus its MIC when tested alone.

<sup>3</sup> Panels are rehydrated with Mueller-Hinton broth supplemented with 5% lysed horse blood (LHB) for Streptococci as recommended by EUCAST and with Hemophilus Test Medium (HTM) for Hemophilus testing as recommended by CLSI, after inoculation of the broth with a standardized suspension of the organism.

**Table S2.a)** MicroScan MSF Dried Overnight Gram-Negative panel are designed for use in determining antimicrobial agent susceptibility of aerobic and facultatively anaerobic gram-negative bacilli (Enterobacteriaceae and non-fermenting Gram negative bacilli)

| C           | G           |             |             | 8<br>AMP       | 16<br>AMP    | 32<br>AMP     | 64<br>AMP   | 2/2<br>AMC  | 8/2<br>AMC   | 16/2<br>AMC | 32/2<br>AMC |
|-------------|-------------|-------------|-------------|----------------|--------------|---------------|-------------|-------------|--------------|-------------|-------------|
| 8/4<br>PIT  | 16/4<br>PIT | 32/4<br>PIT | 64/4<br>PIT | 2<br>CTA       | 16<br>CTA    | 1<br>CTZ      | 4<br>CTZ    | 8<br>CTZ    | 16<br>CTZ    |             |             |
|             |             |             |             | 0.5/4<br>CTXAC | 4/4<br>CTXAC | 0.25/4<br>CCV | 2/4<br>CCV  | 1<br>CTR    | 2<br>CTR     | 4<br>CTR    | 8<br>CTR    |
| 0.06<br>CIP | 0.12<br>CIP | 0.25<br>CIP | 0.5<br>CIP  | 1<br>CIP       | 2<br>CIP     |               |             |             |              |             |             |
| 8<br>AMI    | 16<br>AMI   | 32<br>AMI   | 2<br>GEN    | 4<br>GEN       | 8<br>GEN     | 16<br>GEN     | 1<br>TIG    | 2<br>TIG    | 4<br>TIG     | 8<br>TIG    |             |
| 4<br>CHL    | 8<br>CHL    | 16<br>CHL   | 2<br>COL    | 4<br>COL       | 32<br>FOS    | 64<br>FOS     | 2/38<br>TRS | 4/76<br>TRS | 8/152<br>TRS |             |             |
| 0.12<br>MER | 0.25<br>MER | 0.5<br>MER  | 1<br>MER    | 2<br>MER       | 4<br>MER     | 8<br>MER      | 16<br>MER   |             |              |             |             |
| 0.5<br>IMI  | 1<br>IMI    | 2<br>IMI    | 4<br>IMI    | 8<br>IMI       | 16<br>IMI    | 0.12<br>ERT   | 0.25<br>ERT | 0.5<br>ERT  | 1<br>ERT     | 2<br>ERT    | 4<br>ERT    |

| Abbr. | Antimicrobial Agents          | Dilutions       |
|-------|-------------------------------|-----------------|
| C     | Negative Control              |                 |
| G     | Growth Control                |                 |
| AMI   | Amikacin                      | 8-32            |
| AMC   | Amoxicillin/Clavulanic Acid   | 2/2, 8/2 - 32/2 |
| AMP   | Ampicillin                    | 8 - 64          |
| CTA   | Cefotaxime                    | 2, 16           |
| CTXAC | Cefotaxime/Clavulanic Acid    | 0.5/7, 4/4      |
| CTZ   | Ceftazidime                   | 1, 4 -16        |
| CCV   | Ceftazidime/Clavulanic        | 0.25/4, 2/4     |
| CTR   | Ceftriaxone                   | 1 - 8           |
| CHL   | Chloramphenicol               | 4 - 16          |
| CIP   | Ciprofloxacin                 | 0.06 - 2        |
| COL   | Colistin                      | 2 - 4           |
| ERT   | Ertapenem                     | 0.12 - 4        |
| FOS   | Fosfomycin                    | 32 - 64         |
| GEN   | Gentamicin                    | 2 - 16          |
| IMI   | Imipenem                      | 0.5 - 16        |
| MER   | Meropenem                     | 0.12 - 16       |
| PIT   | Piperacillin/Tazobactam       | 8/4 - 64/4      |
| TIG   | Tigecycline                   | 1 - 8           |
| TRS   | Trimethoprim/Sulfamethoxazole | 2 / 38 - 8/152  |

**Table S2.b)** MicroScan MSF Dried Overnight Gram Positive panel are designed for the determination of antimicrobial agent susceptibility of rapidly growing aerobic and facultative gram-positive cocci (*Staphylococcus.spp* and *Enterococcus.spp*)

| C           | G          |           | TFG       | 0.12<br>PEN  | 0.25<br>PEN | 0.5<br>PEN     | 1<br>PEN    | 4<br>AMP    | 8<br>AMP    | 16<br>AMP | 32<br>AMP |
|-------------|------------|-----------|-----------|--------------|-------------|----------------|-------------|-------------|-------------|-----------|-----------|
| 0.25<br>OXA | 0.5<br>OXA | 1<br>OXA  | 2<br>OXA  | 4<br>CfxS    | 0.5<br>CIP  | 1<br>CIP       | 2<br>CIP    | 4<br>CIP    |             |           |           |
| 8<br>AMI    | 16<br>AMI  | 32<br>AMI | 64<br>AMI | 1<br>GEN     | 2<br>GEN    | 500<br>GmS     |             |             |             |           |           |
| 2<br>TEI    | 4<br>TEI   | 8<br>TEI  | 16<br>TEI | 2<br>VAN     | 4<br>VAN    | 8<br>VAN       | 16<br>VAN   |             |             |           |           |
| 0.25<br>CLI | 0.5<br>CLI | 1<br>CLI  | 2<br>CLI  | 4/0.5<br>ICd | 0.5<br>ERY  | 1<br>ERY       | 2<br>ERY    | 4<br>ERY    | 1<br>QUD    | 2<br>QUD  | 4<br>QUD  |
| 1<br>LIN    | 2<br>LIN   | 4<br>LIN  | 8<br>LIN  |              |             |                |             |             |             |           |           |
| 1<br>DAP    | 2<br>DAP   | 4<br>DAP  | 8<br>DAP  | 32<br>FOS    | 64<br>FOS   | 0.5/9.5<br>TRS | 1/19<br>TRS | 2/38<br>TRS | 4/76<br>TRS |           |           |
| 1<br>TET    | 2<br>TET   | 4<br>TET  | 8<br>TET  | 0.25<br>TIG  | 0.5<br>TIG  | 1<br>TIG       | 2<br>TIG    |             |             |           |           |

| Abbr. | Antimicrobial Agents          | Dilutions            |
|-------|-------------------------------|----------------------|
| C     | Negative Control              |                      |
| G     | Growth Control                |                      |
| TFG   | Thymidine Free Growth Well    | (Comparator for SXT) |
| AMI   | Amikacin                      | 8 - 64               |
| AMP   | Ampicillin                    | 4 - 32               |
| CfxS  | Cefoxitin Screen              | 4                    |
| CIP   | Ciprofloxacin                 | 0.5 - 4              |
| CLI   | Clindamycin                   | 0.25 - 2             |
| DAP   | Daptomycin                    | 1 - 8                |
| ERY   | Erythromycin                  | 0.5 - 4              |
| FOS   | Fosfomycin                    | 32 - 64              |
| GEN   | Gentamicin                    | 1 - 2                |
| GmS   | Gentamicin Synergy Screen     | 500                  |
| Icd   | Inducible Clindamycin Test    | 4 / 0.5              |
| LIN   | Linezolid                     | 1 - 8                |
| OXA   | Oxacillin                     | 0.25 - 2             |
| PEN   | Penicillin                    | 0.12 - 1             |
| QUD   | Quinupristin/Dalfopristin     | 1 - 4                |
| TEI   | Teicoplanin                   | 2 - 15               |
| TET   | Tetracycline                  | 1 - 8                |
| TIG   | Tigecycline                   | 0.25 - 2             |
| TRS   | Trimethoprim/Sulfamethoxazole | 0.5 / 9.5 - 4 / 76   |
| VAN   | Vancomycin                    | 2 - 16               |

**Table S2.c)** MicroScan MSF Dried Overnight Fastidious panel are designed for use in determining antimicrobial agent susceptibility of aerobic non-enterococcal streptococci (including *Streptococcus pneumoniae*) and *Haemophilus* spp. Not to be used for testing of *Neisseria*

| G           |             |             |            |                |             |             |             |             |            |          |          |
|-------------|-------------|-------------|------------|----------------|-------------|-------------|-------------|-------------|------------|----------|----------|
| 0.06<br>PEN | 0.12<br>PEN | 0.25<br>PEN | 0.5<br>PEN | 1<br>PEN       | 2<br>PEN    |             |             |             |            |          |          |
| 0.12<br>AMP | 0.5<br>AMP  | 1<br>AMP    | 2<br>AMP   | 0.12<br>CTR    | 0.5<br>CTR  | 1<br>CTR    | 2<br>CTR    | 0.25<br>MER | 0.5<br>MER | 1<br>MER | 2<br>MER |
| 0.06<br>CIP | 0.12<br>CIP | 0.5<br>LEV  | 2<br>LEV   | 4<br>LEV       |             |             |             |             |            |          |          |
| 2<br>VAN    | 4<br>VAN    | 8<br>VAN    | 16<br>VAN  |                |             |             |             |             |            |          |          |
| 0.5<br>CLI  | 1<br>CLI    | 2<br>CLI    | 4<br>CLI   |                |             |             |             |             |            |          |          |
| 2<br>LIN    | 4<br>LIN    | 8<br>LIN    | 16<br>LIN  |                |             |             |             |             |            |          |          |
| 2<br>CHL    | 4<br>CHL    | 8<br>CHL    | 16<br>CHL  | 0.5/9.5<br>TRS | 1/19<br>TRS | 2/38<br>TRS | 4/76<br>TRS |             |            |          |          |

| Abbr.                                                                                          | Antimicrobial Agents                | Dilutions      |
|------------------------------------------------------------------------------------------------|-------------------------------------|----------------|
| C                                                                                              | Negative Control                    |                |
| NOTE = No Negative Control Well (C) because broth is added to the entire panel when inoculated |                                     |                |
| AMP                                                                                            | Ampicillin – AMP                    | 0.12 , 0.5 - 2 |
| CTR                                                                                            | Ceftriaxone – CTR                   | 0.12 , 0.5 - 2 |
| CHL                                                                                            | Chloramphenicol – CHL               | 2 - 16         |
| CIP                                                                                            | Ciprofloxacin – CIP                 | 0.06 - 0.12    |
| CLI                                                                                            | Clindamycin – CLI                   | 0.5 - 4        |
| LEV                                                                                            | Levofloxacin – LEV                  | 0.5, 2 - 4     |
| LIN                                                                                            | Linezolid – LIN                     | 2 - 16         |
| MER                                                                                            | Meropenem – MER                     | 0.25 - 2       |
| PEN                                                                                            | Penicillin – PEN                    | 0.06 - 2       |
| CIP                                                                                            | Trimethoprim/Sulfamethoxazole – TRS | 0.5/9.5 - 4/76 |
| VAN                                                                                            | Vancomycin – VAN                    | 2 - 16         |

**Table S3.** Technical information on the different panel, disc, media used for the experiment (Lot number, reference, expiry date, etc.)

| Item                                                                      | Method        | Cond            | Brand      | Ref        | Batch    | Date exp   |
|---------------------------------------------------------------------------|---------------|-----------------|------------|------------|----------|------------|
| Pos MIC Panel Type 1                                                      | BMD           | 20/box          | BC         | B1020-103B | 19190329 | 2020-01-10 |
| Neg MIC MSF Panel Type 1                                                  | BMD           | 20/box          | BC         | B1020-104B | 19190330 | 2020-01-10 |
| FAST MSF RUO MIC Panel Type 1                                             | BMD           | 20/box          | BC         | B1020-105W | 19190331 | 2020-02-10 |
| Prompt                                                                    | Inoculum      | 60/box          | BC         | B1026-10D  | 19170714 | 2020-01-10 |
| Cation-adjusted Mueller-Hinton Broth with 3% Lysed Horse Blood, 25mL (BC) | Broth         | 10/box          | BC         | B1015-25   | 19190328 | 2020-01-10 |
| Haemophilus Test Medium (HTM), 25mL                                       | Broth         | 10/box          | BC         | B1015-26   | 19190326 | 2020-03-10 |
| Inoculator-D Set, 60/pk (BC)                                              | Consumable    | 260/box         | BC         | B1013-5    | 19190324 | 2023-04-10 |
| Inoculum Water, 3mL (BC)                                                  | Inoculum      | 60/box          | BC         | B1015-2    | 19190907 | 2020-04-10 |
| Inoculum Water with Pluronic, 25 mL                                       | Inoculum      | 60/box          | BC         | B1015-7    | 19190928 | 2020-04-10 |
| Amikacin                                                                  | 30µg          | 4 x 50 Disc     | Biorad     | 66148      | 64240285 | 2019-12-10 |
| Amoxicillin/Clavulanic Acid                                               | 20-10µg       | 4 x 50 Disc     | Biorad     | 66178      | 200417A  | 2019-10    |
| Ampicillin                                                                | 2µg           | 4 x 50 Disc     | Biorad     | 67288      | 64239659 | 2019-11-27 |
| Ampicilline                                                               | 10µg          | 4 x 50 Disc     | Biorad     | 66128      | 64239660 | 2019-11-12 |
| Cefepime                                                                  | 30µg          | 4 x 50 Disc     | Biorad     | 66098      | 64261585 | 2020-03-17 |
| Cefepime/Clavulanic Acid                                                  | 30µg/10µg     | 4 x 50 Disc     | Biorad     | 66466      | 190117G  | 2020-01    |
| Cefotaxime                                                                | 5µg           | 4 x 50 Disc     | Biorad     | 67718      | 64253166 | 2020-02-11 |
| Cefotaxime/Clavulanic Acid                                                | 5µg/10µg      | 4 x 50 Disc     | Biorad     | 68456      | 190117N  | 2020-01    |
| Cefoxitin Screen                                                          | 30 µg         | 4 x 50 Disc     | Biorad     | 66228      | 200318A  | 2020-04    |
| Ceftazidime                                                               | 10µg          | 4 x 50 Disc     | Biorad     | 67298      | 64251000 | 2020-01-27 |
| Ceftazidime/Clavulanic Acid                                               | 30µg/10µg     | 4 x 50 Disc     | Biorad     | 68446      | 64251001 | 2020-01-27 |
| Ceftriaxone                                                               | 30µg          | 4 x 50 Disc     | Biorad     | 66188      | 200414C  | 2020-04    |
| Chloramphenicol                                                           | 30 µg         | 4 x 50 Disc     | Biorad     | 66278      | 64221108 | 2020-09-11 |
| Ciprofloxacin                                                             | 5µg           | 4 x 50 Disc     | Biorad     | 68648      | 64240327 | 2020-02-17 |
| Clindamycin                                                               | 2 µg          | 4 x 50 Disc     | Biorad     | 66328      | 64246826 | 2020-01-03 |
| Colistin                                                                  | BMD           | 8*10            | Fisher     | FRCOL      | B1441A   | 2020-01    |
| Ertapenem                                                                 | 10µg          | 4 x 50 Disc     | Biorad     | 67518      | 64248425 | 2019-02-14 |
| Erythromycin                                                              | 15 µg         | 4 x 50 Disc     | Biorad     | 66448      | 64231553 | 2019-11-05 |
| AD Fosfomycin 0.25-256                                                    | Agar dilution | 6 test          | Liofilchem | 77061      | 22122083 | 2020-12-18 |
| Gentamicin                                                                | 10µg          | 4 x 50 Disc     | Biorad     | 66608      | 64246826 | 2020-03-18 |
| Gentamicin Synergy Screen                                                 | 30µg          | 4 x 50 Disc     | Biorad     | 667318     | 64182638 | 2020-03-25 |
| Imipenem                                                                  | 10µg          | 4 x 50 Disc     | Biorad     | 66568      | 4331644  | 2020-10-31 |
| Levofloxacin                                                              | 5µg           | 4 x 50 Disc     | Biorad     | 66858      | 4331644  | 2020-10-31 |
| Linezolid                                                                 | 10 µg         | 4 x 50 Disc     | Biorad     | 67878      | 200417D  | 2020-07    |
| Meropenem                                                                 | 10µg          | 4 x 50 Disc     | Biorad     | 67048      | 64261586 | 2020-03-17 |
| Penicillin                                                                | 1 unit        | 4 x 50 Disc     | Biorad     | 67788      | 64226720 | 2019-10-08 |
| Piperacillin/Tazobactam                                                   | 30-6µg        | 4 x 50 Disc     | Biorad     | 67338      | 64248373 | 2020-01-13 |
| Quinupristin/Dalfopristin                                                 | 15 µg         | 4 x 50 Disc     | Biorad     | 67528      | 64221134 | 2020-10-03 |
| Teico/ Vanco / Dapto MIC                                                  | BMD           | 10              | Fisher     | FRUNIGP1   | B1341B   | 2020-08    |
| Teicoplanin                                                               | 30µg          | 4 x 50 Disc     | Biorad     | 68948      | 64240292 | 2019-12-12 |
| Tetracycline                                                              | 30µg          | 4 x 50 Disc     | Biorad     | 67448      | 64240328 | 2020-01-01 |
| Tigecycline                                                               | 15µg          | 4 x 50 Disc     | Biorad     | 67398      | 64248382 | 2020-02-10 |
| Trimethoprim/Sulfa                                                        | 1.25-23.75µg  | 4 x 50 Disc     | Biorad     | 68898      | 64240288 | 2019-12-19 |
| Vancomycin                                                                | 5µg           | 4 x 50 Disc     | Biorad     | 68888      | 64219266 | 2020-08-28 |
| Mueller-Hinton-F square                                                   | Agar          | 10 plaques      | Biorad     | 63525      | 64468399 | 2020-02    |
| Mueller-Hinton square                                                     | Agar          | 10 plaques      | Biorad     | 63901      | 64460701 | 2020-05    |
| Chocolate agar w/o Vitox                                                  | Agar          | 20 plates 90 mm | Liofilchem | 10601      | 22122082 | 2019-10    |

**Table S4:** Results for Staphylococci tested with MICPOS1 using Prompt inoculum method and visual reading versus AST reference panels

| Antimicrobial                 | No. of isolates            |    |   |    | No. of isolates      |    |    |          | PtCA <sub>d</sub><br>(no. [%]) | PtmE <sub>e</sub><br>(no. [%]) | PtME <sub>f</sub><br>(no. [%]) | PtVME <sub>g</sub><br>(no. [%]) |
|-------------------------------|----------------------------|----|---|----|----------------------|----|----|----------|--------------------------------|--------------------------------|--------------------------------|---------------------------------|
|                               | AST Reference <sub>b</sub> |    |   |    | MICPOS1 <sub>c</sub> |    |    |          |                                |                                |                                |                                 |
|                               | Total <sub>a</sub>         | R  | I | S  | R                    | I  | S  |          |                                |                                |                                |                                 |
| Penicillin                    | 63                         | 59 | 0 | 4  | 59                   | 0  | 4  | 63(100)  | 0 (0)                          | 0 (0)                          | 0 (0)                          |                                 |
| Ciprofloxacin                 | 74                         | 37 | 0 | 37 | 43                   | 0  | 31 | 68 (92)  | 0 (0)                          | 6 (8)                          | 0 (0)                          |                                 |
| Amikacin                      | 74                         | 17 | 4 | 53 | 18                   | 4  | 52 | 73 (99)  | 0 (0)                          | 1 (1)                          | 0 (0)                          |                                 |
| Gentamicin                    | 74                         | 28 | 0 | 46 | 33                   | 11 | 30 | 58 (78)  | 11 (15)                        | 5 (7)                          | 0 (0)                          |                                 |
| Teicoplanin                   | 74                         | 3  | 0 | 71 | 10                   | 0  | 64 | 67 (91)  | 0 (0)                          | 7 (9)                          | 0 (0)                          |                                 |
| Vancomycin                    | 74                         | 2  | 0 | 72 | 4                    | 0  | 70 | 72 (97)  | 0 (0)                          | 2 (3)                          | 0 (0)                          |                                 |
| Quinupristin-dalfopristin     | 74                         | 0  | 7 | 67 | 2                    | 7  | 65 | 70 (95)  | 0 (0)                          | 3 (4)                          | 1 (1)                          |                                 |
| Erythromycin                  | 74                         | 30 | 0 | 44 | 30                   | 0  | 44 | 74 (100) | 0 (0)                          | 0 (0)                          | 0 (0)                          |                                 |
| Clindamycin                   | 74                         | 14 | 0 | 60 | 20                   | 1  | 53 | 65 (88)  | 1 (1)                          | 7 (9)                          | 1 (1)                          |                                 |
| Daptomycin                    | 74                         | 1  | 0 | 73 | 1                    | 0  | 73 | 72 (97)  | 0 (0)                          | 1 (1)                          | 1 (1)                          |                                 |
| Fosfomycin                    | 74                         | 29 | 0 | 45 | 29                   | 0  | 45 | 74 (100) | 0 (0)                          | 0(0)                           | 0 (0)                          |                                 |
| Trimethoprim/Sulfamethoxazole | 74                         | 18 | 0 | 56 | 29                   | 0  | 55 | 71 (96)  | 0 (0)                          | 2 (3)                          | 1 (1)                          |                                 |
| Linezolid                     | 74                         | 5  | 0 | 69 | 6                    | 0  | 68 | 73 (99)  | 0 (0)                          | 1 (1)                          | 0 (0)                          |                                 |
| Tetracycline                  | 74                         | 37 | 0 | 37 | 47                   | 4  | 23 | 60 (81)  | 4 (5)                          | 10 (14)                        | 0 (0)                          |                                 |
| Tigecycline                   | 74                         | 0  | 0 | 74 | 4                    | 0  | 70 | 70 (95)  | 0 (0)                          | 4 (5)                          | 0 (0)                          |                                 |

a Total number of isolates tested by antibiotic

b Number of isolate tested classified with reference method by R resistant; I, intermediate; S, susceptible.

c Number of isolate tested classified with evaluated method by R resistant; I, intermediate; S, susceptible

d PtCA, categorical agreement with PROMPT inoculum.

e PtmE, minor error with PROMPT inoculum.

f PtME, major error with PROMPT inoculum.

g PtVME, very major error with PROMPT inoculum.

**Table S5:** Results for Enterococci tested with MICPOS1 using Prompt inoculum method and visual reading versus AST reference panels

| Antimicrobial             | No. of isolates            |    |    |    | No. of isolates      |    |    |          | PtCA <sub>d</sub><br>(no. [%]) | PtmE <sub>e</sub><br>(no. [%]) | PtME <sub>f</sub><br>(no. [%]) | PtVME <sub>g</sub><br>(no. [%]) |
|---------------------------|----------------------------|----|----|----|----------------------|----|----|----------|--------------------------------|--------------------------------|--------------------------------|---------------------------------|
|                           | AST Reference <sub>b</sub> |    |    |    | MICPOS1 <sub>c</sub> |    |    |          |                                |                                |                                |                                 |
|                           | Total <sub>a</sub>         | R  | I  | S  | R                    | I  | S  |          |                                |                                |                                |                                 |
| Ampicillin                | 49                         | 30 | 0  | 19 | 29                   | 1  | 18 | 47 (96)  | 0 (0)                          | 1 (2)                          | 1 (2)                          |                                 |
| Ciprofloxacin             | 49                         | 29 | 0  | 20 | 30                   | 0  | 19 | 48 (98)  | 0 (0)                          | 1 (2)                          | 0 (0)                          |                                 |
| Teicoplanin               | 49                         | 23 | 0  | 26 | 23                   | 0  | 26 | 47 (96)  | 0(0)                           | 1 (2)                          | 1 (2)                          |                                 |
| Vancomycin                | 49                         | 23 | 0  | 26 | 23                   | 0  | 26 | 49 (100) | 0 (0)                          | 0 (0)                          | 0 (0)                          |                                 |
| Quinupristin-dalfopristin | 49                         | 19 | 16 | 14 | 19                   | 16 | 14 | 49 (100) | 0 (0)                          | 0(0)                           | 0 (0)                          |                                 |
| Linezolid                 | 49                         | 2  | 0  | 47 | 2                    | 7  | 40 | 42 (91)  | 7 (9)                          | 0 (0)                          | 0 (0)                          |                                 |
| Tigecycline               | 49                         | 4  | 0  | 45 | 4                    | 0  | 45 | 49 (100) | 0 (0)                          | 0 (0)                          | 0 (0)                          |                                 |

a Total number of isolates tested by antibiotic

b Number of isolate tested classified with reference method by R resistant; I, intermediate; S, susceptible.

c Number of isolate tested classified with evaluated method by R resistant; I, intermediate; S, susceptible

d PtCA, categorical agreement with PROMPT inoculum.

e PtmE, minor error with PROMPT inoculum.

f PtME, major error with PROMPT inoculum.

g PtVME, very major error with PROMPT inoculum.

**Table S6:** Results for Enterobacterales tested with MICNEG1 using Prompt inoculum method and visual reading versus AST reference panels

| Antimicrobial                 | No. of isolates            |     |   |     | No. of isolates       |    |     |           | PtCA <sub>d</sub><br>(no. [%]) | PtmE <sub>e</sub><br>(no. [%]) | PtME <sub>f</sub><br>(no. [%]) | PtVME <sub>g</sub><br>(no. [%]) |
|-------------------------------|----------------------------|-----|---|-----|-----------------------|----|-----|-----------|--------------------------------|--------------------------------|--------------------------------|---------------------------------|
|                               | AST Reference <sub>b</sub> |     |   |     | MICPNEG1 <sub>c</sub> |    |     |           |                                |                                |                                |                                 |
|                               | Total <sub>a</sub>         | R   | I | S   | R                     | I  | S   |           |                                |                                |                                |                                 |
| Ampicillin                    | 112                        | 100 | 0 | 12  | 99                    | 0  | 13  | 111 (99)  | 0 (0)                          | 0 (0)                          | 1 (1)                          |                                 |
| Amoxicillin/Clavulanic Acid   | 112                        | 72  | 0 | 40  | 73                    | 0  | 39  | 109 (97)  | 0 (0)                          | 2 (2)                          | 1 (1)                          |                                 |
| Ceftazidime                   | 112                        | 47  | 2 | 63  | 49                    | 0  | 64  | 108 (96)  | 3 (3)                          | 1 (1)                          | 0 (0)                          |                                 |
| Ceftriaxone                   | 112                        | 50  | 0 | 62  | 51                    | 1  | 60  | 110 (98)  | 1 (1)                          | 1 (1)                          | 0 (0)                          |                                 |
| Piperacillin/Tazobactam       | 112                        | 39  | 4 | 69  | 39                    | 4  | 69  | 112 (100) | 0 (0)                          | 0 (0)                          | 0 (0)                          |                                 |
| Ciprofloxacin                 | 112                        | 51  | 4 | 57  | 54                    | 8  | 49  | 107 (95)  | 3 (3)                          | 3 (3)                          | 0 (0)                          |                                 |
| Amikacin                      | 112                        | 16  | 4 | 92  | 18                    | 11 | 83  | 104 (92)  | 7 (6)                          | 2 (2)                          | 0 (0)                          |                                 |
| Gentamicin                    | 112                        | 40  | 5 | 67  | 40                    | 8  | 64  | 108 (96)  | 3 (3)                          | 1 (1)                          | 1 (1)                          |                                 |
| Trimethoprim/Sulfamethoxazole | 112                        | 69  | 1 | 42  | 70                    | 2  | 40  | 106 (94)  | 1 (1)                          | 3 (3)                          | 2 (2)                          |                                 |
| Chloramphenicol               | 112                        | 47  | 0 | 65  | 46                    | 1  | 65  | 108 (96)  | 1 (1)                          | 1 (1)                          | 2 (2)                          |                                 |
| Colistin                      | 112                        | 12  | 0 | 77  | 15                    | 0  | 74  | 109 (97)  | 0 (0)                          | 3 (3)                          | 0 (0)                          |                                 |
| Fosfomycin                    | 112                        | 1   | 0 | 111 | 2                     | 0  | 110 | 109 (97)  | 0 (0)                          | 2 (2)                          | 1 (1)                          |                                 |
| Tigecycline                   | 112                        | 0   | 0 | 112 | 0                     | 0  | 112 | 112 (100) | 0 (0)                          | 0 (0)                          | 0 (0)                          |                                 |
| Meropenem                     | 112                        | 16  | 6 | 90  | 16                    | 6  | 90  | 112 (100) | 0 (0)                          | 0 (0)                          | 0 (0)                          |                                 |
| Imipenem                      | 112                        | 19  | 7 | 86  | 20                    | 12 | 90  | 107 (95)  | 5 (4)                          | 1 (1)                          | 0 (0)                          |                                 |
| Ertapenem                     | 112                        | 33  | 0 | 79  | 34                    | 6  | 84  | 106 (94)  | 6 (5)                          | 1 (1)                          | 0 (0)                          |                                 |

a Total number of isolates tested by antibiotic

b Number of isolate tested classified with reference method by R resistant; I, intermediate; S, susceptible.

c Number of isolate tested classified with evaluated method by R resistant; I, intermediate; S, susceptible

d PtCA, categorical agreement with PROMPT inoculum.

e PtmE, minor error with PROMPT inoculum.

f PtME, major error with PROMPT inoculum.

g PtVME, very major error with PROMPT inoculum.

**Table S7:** Results for Non-fermenting Gram negative bacilli tested with MICNEG1 using Prompt inoculum method and visual reading versus AST reference panels

| Antimicrobial                 | No. of isolates            |    |   |    | No. of isolates       |   |    |          | PtCA <sub>d</sub><br>(no. [%]) | PtmE <sub>e</sub><br>(no. [%]) | PtME <sub>f</sub><br>(no. [%]) | PtVME <sub>g</sub><br>(no. [%]) |
|-------------------------------|----------------------------|----|---|----|-----------------------|---|----|----------|--------------------------------|--------------------------------|--------------------------------|---------------------------------|
|                               | AST Reference <sub>b</sub> |    |   |    | MICPNEG1 <sub>c</sub> |   |    |          |                                |                                |                                |                                 |
|                               | Total <sub>a</sub>         | R  | I | S  | R                     | I | S  |          |                                |                                |                                |                                 |
|                               |                            |    |   |    |                       |   |    |          |                                |                                |                                |                                 |
| Ceftazidime                   | 15                         | 8  | 3 | 4  | 8                     | 3 | 4  | 15 (100) | 0 (0)                          | 0 (0)                          | 0 (0)                          |                                 |
| Piperacillin/Tazobactam       | 15                         | 4  | 0 | 11 | 4                     | 0 | 11 | 15 (100) | 0 (0)                          | 0 (0)                          | 0 (0)                          |                                 |
| Ciprofloxacin                 | 29                         | 12 | 6 | 11 | 12                    | 6 | 11 | 29 (100) | 0 (0)                          | 0 (0)                          | 0 (0)                          |                                 |
| Amikacin                      | 29                         | 7  | 2 | 20 | 7                     | 3 | 19 | 28 (97)  | 1 (3)                          | 0 (0)                          | 0 (0)                          |                                 |
| Gentamicin                    | 29                         | 15 | 0 | 14 | 15                    | 0 | 14 | 29 (100) | 0 (0)                          | 0 (0)                          | 0 (0)                          |                                 |
| Trimethoprim/Sulfamethoxazole | 29                         | 10 | 0 | 20 | 10                    | 0 | 20 | 30 (100) | 0 (0)                          | 0 (0)                          | 0 (0)                          |                                 |
| Chloramphenicol               | 9                          | 4  | 3 | 2  | 4                     | 3 | 2  | 9 (100)  | 0 (0)                          | 0 (0)                          | 0 (0)                          |                                 |
| Colistin                      | 15                         | 3  | 0 | 12 | 3                     | 0 | 12 | 15 (100) | 0 (0)                          | 0 (0)                          | 0 (0)                          |                                 |
| Meropenem                     | 45                         | 14 | 6 | 25 | 14                    | 8 | 23 | 45 (96)  | 2 (4)                          | 0 (0)                          | 0 (0)                          |                                 |

|          |    |    |   |    |    |   |    |         |       |       |       |
|----------|----|----|---|----|----|---|----|---------|-------|-------|-------|
| Imipenem | 29 | 12 | 0 | 17 | 12 | 0 | 17 | 29 (97) | 0 (0) | 0 (0) | 1 (3) |
|----------|----|----|---|----|----|---|----|---------|-------|-------|-------|

a Total number of isolates tested by antibiotic

b Number of isolate tested classified with reference method by R resistant; I, intermediate; S, susceptible.

c Number of isolate tested classified with evaluated method by R resistant; I, intermediate; S, susceptible

d PtCA, categorical agreement with PROMPT inoculum.

e PtME, minor error with PROMPT inoculum.

f PtME, major error with PROMPT inoculum.

g PtVME, very major error with PROMPT inoculum.

**Table S8:** Results for specific resistance test using MICNEG1 or MICPOS1 using Prompt inoculum method and visual reading versus AST reference methods

| Multidrug resistant organism                                          | No. of isolates            |    |    | No. of isolates        |    | PtCA <sup>d</sup><br>(no. [%]) | PtME <sup>e</sup><br>(no. [%]) | PtVME <sup>f</sup><br>(no. [%]) |
|-----------------------------------------------------------------------|----------------------------|----|----|------------------------|----|--------------------------------|--------------------------------|---------------------------------|
|                                                                       | AST Reference <sup>b</sup> |    |    | MSF panel <sup>c</sup> |    |                                |                                |                                 |
|                                                                       | Total <sup>a</sup>         | R  | S  | R                      | S  |                                |                                |                                 |
| Methycillin resistant <i>Staphylococcus aureus</i> <sub>g</sub>       | 47                         | 33 | 14 | 34                     | 13 | 46 (99)                        | 1 (1)                          | 0 (0)                           |
| Inducible clindamycin resistant <i>Staphylococci</i> <sub>g</sub>     | 74                         | 26 | 48 | 26                     | 48 | 74 (100)                       | 0 (0)                          | 0(0)                            |
| Vancomycin resistant <i>Staphylococcus aureus</i> <sub>g</sub>        | 47                         | 2  | 45 | 4                      | 43 | 43 (96)                        | 3 (4)                          | 1 (1)                           |
| High-level gentamicin resistance <i>Enterococci</i> <sub>g</sub>      | 49                         | 25 | 24 | 25                     | 24 | 47 (100)                       | 1 (2)                          | 1 (2)                           |
| Vancomycin resistant <i>Enterococci</i> <sub>g</sub>                  | 49                         | 23 | 26 | 23                     | 26 | 49 (100)                       | 0 (0)                          | 0(0)                            |
| Extented spectrum beta lactamase <i>Enterobacterales</i> <sub>h</sub> | 112                        | 19 | 93 | 19                     | 93 | 112 (100)                      | 0 (0)                          | 0(0)                            |
| Carbapenem resistant <i>Enterobacterales</i> <sub>h</sub>             | 112                        | 33 | 79 | 32                     | 80 | 0 (0)                          | 0 (0)                          | 1 (1)                           |
| Colistin resistant <i>Enterobacterales</i> <sub>h</sub>               | 112                        | 12 | 77 | 13                     | 76 | 112 (97)                       | 2 (2)                          | 1 (1)                           |
| Carbapenem resistant <i>Pseudomonas aeruginosa</i> <sub>h</sub>       | 15                         | 4  | 11 | 4                      | 11 | 15 (100)                       | 0 (0)                          | 0 (0)                           |
| Colistin resistant <i>Pseudomonas aeruginosa</i> <sub>h</sub>         | 15                         | 4  | 11 | 4                      | 11 | 15 (100)                       | 0 (0)                          | 0 (0)                           |
| Carbapenem resistant <i>Acinetobacter baumannii</i> <sub>h</sub>      | 14                         | 8  | 6  | 7                      | 7  | 15 (100)                       | 0 (0)                          | 1 (3)                           |

a Total number of isolates tested by antibiotic

b Number of isolate tested classified with reference method by R resistant; I, intermediate; S, susceptible.

c Number of isolate tested classified with evaluated method by R resistant; I, intermediate; S, susceptible

d PtCA, categorical agreement with PROMPT inoculum.

e PtME, major error with PROMPT inoculum.

f PtVME, very major error with PROMPT inoculum.

g Resistance test evaluated on the MICPOS1 panel.

h Resistance test evaluated on the MICNEG1 panel.



## Prompt® Inoculation System-D For Use with Microdilution Susceptibility Tests

### Intended Use

The Prompt Inoculation System-D is used to standardize inocula for microdilution antimicrobial susceptibility tests.

### Summary

The microdilution procedure for antimicrobial susceptibility testing has provided the clinical microbiologist with a reliable method for obtaining meaningful quantitative susceptibility test results. This procedure is used to determine the minimum inhibitory concentration (MIC) of antimicrobial agents and has rapidly gained broad acceptance in the clinical laboratory.<sup>1</sup> Accuracy and reproducibility in the MIC procedure depend on use of defined materials and methods.

One of the important requirements in the MIC procedure is control of the bacterial population of the inoculum within defined limits. This step may be accomplished in two ways:

- 1) manual adjustment of the inoculum to match a 0.5 McFarland turbidity standard<sup>2</sup> followed by appropriate dilution or
- 2) incubation to stationary phase in broth culture<sup>3</sup> followed by appropriate dilution.

The Prompt Inoculation System-D provides the microbiologist with a method for obtaining standardized inocula while eliminating the need for incubation and turbidity adjustment.<sup>4,5,6,7</sup>

Microdilution susceptibility results obtained using the Prompt Inoculation System-D show a correlation of 97% or greater with the microdilution susceptibility results obtained with inocula prepared according to the Clinical and Laboratory Standards Institute (CLSI) procedure.<sup>2</sup>

### Principles

The Prompt Inoculation System-D consists of an inoculation wand and a bottle of diluent. The wand is a polypropylene rod with a breakaway collar that serves as a wiping mechanism. The rod is attached to a stopper. At the tip of the wand is a groove designed to hold a specific number of bacteria. Thirty (30) mL of diluent are provided in the plastic bottle. The wand is touched to several bacterial colonies on a primary isolation plate, wiped, then placed in the plastic bottle. The bacteria are suspended by shaking the bottle. The bacterial suspension is stable for four hours. When the Prompt Inoculation System-D is used within four hours after preparation, 97% of MICs are within  $\pm$  one (1) dilution of the MICs determined by the conventional method. The Prompt Inoculation System-D facilitates the MIC inoculum preparation by eliminating: 1) the incubation period, and 2) the need to adjust the inoculum concentration.

### Suspending Solution

Prompt Inoculation System-D catalog number B1026-100 contains 30 mL ( $\pm$  1.0 mL) of stabilized, aqueous PLURONIC® surfactants.

### Warnings and Precautions

1. For *in vitro* diagnostic use only.
2. Colonies must be selected from a FRESH culture plate ( $<$  24 hours).
3. The bacterial suspension should be used within four hours of preparation.
4. DO NOT FLAME the plastic inoculation wand under ANY circumstances.
5. To avoid contamination, keep fingers above the ridge of the stopper and on the outer surface of the collar.
6. Keep wands covered when not in use.
7. Do not use if colonies are smaller than the wand tip.

\* Registered trademark of 3M Company, St. Paul, MN USA

\*\* Registered trademark of BASF Corp., Parsippany, NJ USA

### NOTE:

After inoculation, the Prompt inoculation vial, wand and collar should be considered potential pathogen carriers. Handle and discard the product accordingly.

### Storage

Prompt units should be stored at 2-27°C. Avoid direct light. Do not use units beyond the expiration date shown on the package. Inoculated units may be stored for up to four hours at room temperature.

### Product Deterioration

Prompt bottles should not be used if the bottle or cap is cracked.

### Specimen Collection and Preparation

Specimens received in the laboratory should be treated in the usual manner for the preparation of a primary culture plate. Three isolated colonies larger than the wand tip from an eighteen to twenty-four (18-24) hour culture are needed for use with the Prompt Inoculation System-D.

### Procedure

#### Materials Provided

62 Prompt inoculation wands

50 Prompt inoculation bottles

Prompt Inoculation System-D can be used for preparation of inocula for microdilution MIC testing procedures that use the inoculum suspended in a non-nutritive solution to rehydrate the tray. To use, follow the instructions below.

#### A. Preparation of bacterial suspension

1. Remove the required number of Prompt inoculation bottles from the box.
2. Remove an inoculation wand from the box.
3. Holding the wand tip perpendicular to the agar surface, touch 3 isolated colonies as large as or larger than the tip. Do not penetrate the agar. Do not scrape or drag the tip across the colonies (Figure 1-1).

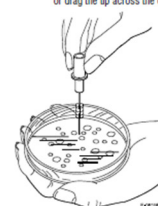

Figure 1-1

#### NOTE:

For very small, pin-point colonies, continue incubation of the primary plate until they reach the diameter of the wand tip. If the colony diameter is not likely to reach this size (for example, some streptococci), an alternate method for inoculum preparation should be used.

4. Holding the wand by the handle with one hand, grasp the collar with the other hand and pull firmly to break the connection between the collar and wand shaft. Do not twist or bend the collar. Keep the tip pointed toward the floor, away from yourself and others (Figure 1-2).

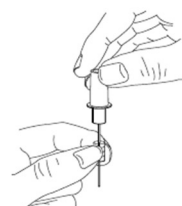

Figure 1-2

5. Slide the collar slowly down and off the wand shaft and discard the collar (Figure 1-3).
6. While holding the inoculation wand with one hand, pick up a Prompt inoculation bottle.

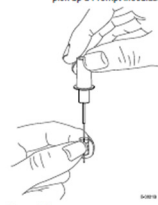

Figure 1-3

7. Bend the cap of the bottle sideways until it snaps off (Figure 1-4).

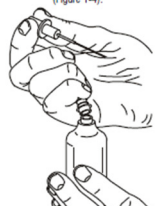

Figure 1-4

8. Place the inoculation wand into the bottle and press down with a twisting motion to assure a tight seal (Figure 1-5).

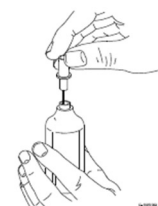

Figure 1-5

9. Shake the bottle vigorously 8 to 10 times to release the bacteria from the wand tip. If the organism is not released from the wand, let the solution sit for 5 minutes and shake again (Figure 1-6).

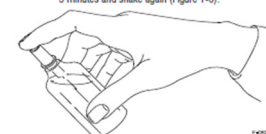

Figure 1-6

10. The bacterial suspension should be used within four hours of preparation. If not used immediately after preparation, shake vigorously to resuspend the bacteria just prior to use.

#### B. Addition of Suspension to Seed Tray

1. Remove the inoculation wand from the bottle and discard.
2. Pour the suspension into the seed tray by gently squeezing the bottle with a pumping action (Figure 1-7).

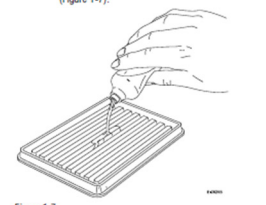

Figure 1-7

3. Proceed with the appropriate microdilution MIC procedure.

**NOTE:**  
The inoculated Prompt bottle, wand and collar should be considered potential pathogen carriers. Handle and discard appropriately.

(a)

(b)

**Figure S1.** Extraction of the Prompt® Inoculation System-D Instruction For Use with Microdilution Susceptibility Tests with, (a) general instructions and (b) bench aid like part with more comprehensive instructions

**Table S9:** Results of the repetition done for AMC discrepant results using different AST methods and brand for disc, media. Were used in this experiment disc from Liofilchem(Liofilchem, Roseto degli Abruzzi, Italy), Biorad, I2A; MH agar from Biorad, Liofilchem, Biomerieux MH Enterobacterales, E-test Gradient strip (E-test, bioMérieux, Marcy l'Étoile, France) and for Broth Microdilution Sensititre (Sensititre, Thermo Fisher Scientific, UK), MICNEG1 (Microscan, Beckman Coulter

| N° isolat | Type of method                 | BMD      |   | BMD         |   | GD         |   | KB      |   | KB     |   | KB     |   | KB     |   |
|-----------|--------------------------------|----------|---|-------------|---|------------|---|---------|---|---------|---|---------|---|---------|---|---------|---|---------|---|--------|---|--------|---|--------|---|
|           | Brand Disc / Brand agar        | MIC-NEG1 |   | Sensi-titre |   | E test/Bio |   | Lio/Bio |   | I2A/Bio |   | Bio/Bio |   | Lio/Lio |   | I2A/Lio |   | Bio/Lio |   | Lio/BM |   | I2A/BM |   | Bio/BM |   |
| 128       | <i>Salmonella typhimurium</i>  | 16       | R | >8          | R | 4          | S | 21      | S | 21      | S | 21      | S | 21      | S | 19      | S | 21      | S | 18     | R | 17     | R | 19     | S |
| 129       | <i>Salmonella typhimurium</i>  | 16       | R | >8          | R | 6          | S | 20      | S | 17      | S | 20      | S | 20      | S | 18      | R | 21      | S | 19     | S | 16     | R | 19     | S |
| 130       | <i>Salmonella choleraesuis</i> | 16       | R | >8          | R | 8          | S | 21      | S | 20      | S | 21      | S | 21      | S | 18      | R | 21      | S | 18     | R | 17     | R | 20     | S |
| 131       | <i>Salmonella choleraesuis</i> | 16       | R | >8          | R | 3          | S | 20      | S | 18      | R | 21      | S | 22      | S | 18      | R | 22      | S | 20     | S | 17     | R | 23     | S |
| 133       | <i>Salmonella choleraesuis</i> | 16       | R | >8          | R | 3          | S | 23      | S | 19      | S | 24      | S | 23      | S | 20      | S | 24      | S | 21     | S | 17     | R | 22     | S |
| 135       | <i>Salmonella choleraesuis</i> | 8        | R | >8          | R | 3          | S | 20      | S | 19      | S | 22      | S | 22      | S | 21      | R | 22      | S | 15     | R | 22     | S | 23     | S |
| 138       | <i>Salmonella typhimurium</i>  | 32       | R | >8          | R | 4          | S | 18      | R | 17      | R | 19      | R | 18      | R | 17      | S | 19      | S | 19     | S | 15     | R | 19     | S |
| 139       | <i>Salmonella typhimurium</i>  | 32       | R | >8          | R | 6          | S | 17      | R | 15      | R | 17      | R | 17      | R | 15      | S | 18      | R | 16     | R | 14     | R | 17     | R |
| 140       | <i>Salmonella typhimurium</i>  | 32       | R | >8          | R | 4          | S | 19      | S | 17      | R | 20      | S | 21      | S | 17      | S | 21      | S | 19     | S | 17     | R | 19     | S |
| 141       | <i>Salmonella typhimurium</i>  | 8        | S | >8          | R | 4          | S | 20      | S | 18      | R | 21      | S | 21      | S | 18      | S | 20      | S | 19     | S | 19     | S | 20     | S |
| 142       | <i>Salmonella typhimurium</i>  | 8        | S | >8          | R | 4          | S | 22      | S | 20      | S | 22      | S | 21      | S | 19      | R | 23      | S | 21     | S | 18     | R | 21     | S |

\*Abbreviations: BMD= Broth Micro Dilution; GD= Gradient Diffusion; KB = Kirby Bauer; Bio = Biorad; Lio = Liofilchem; I2A=I2A

BENCH AID

23

Maladies Sans Frontières  
Mini-Lab

10/AST

Plates reading MIC

This document is a summary of the various SOPs + 10.15 Plates reading MIC  
» Please read the POS before using this FM.

1 Types of growth

Button growth

Growth in turbulence

Star growth

Growth in the presence of red blood

Growth not taken into account

Attention for TRS

positive well only if the haze is  $\geq 80\%$  of the well's G

well G

Effective date : 10/11/2021

Version : V1

Code : FM-23-LECMIC

51

(a)

2 Reading assistance – Plates MIC

NEG MIC and POS MIC Plates

Read the plate only if :  
C = No growth = clear well AND G = growth = cloudy well

FAST MIC Plates

Read the plate only if :  
G = growth = cloudy well

3 Interpretation of resistance mechanisms

|    | Species                                     | Acronym | Definition                                                | Interpretation (MIC or R/S)                                                                                           |
|----|---------------------------------------------|---------|-----------------------------------------------------------|-----------------------------------------------------------------------------------------------------------------------|
| 1  | Enterobacterales and Pseudomonas aeruginosa | ESBL    | Extended Spectrum Bêta-lactamase                          | CTZ-4 $\geq 16$ et CCV $\leq 0.25/4$ and/or CTA 16 $\geq 16$ et CTXAC $\leq 0.5/4$ and/or CTA $> 16$ et CTXAC $= 4/4$ |
| 2  | Enterobacterales                            | CRE     | Carbapenem-resistant Enterobacterales                     | MER $> 0.125$ and/or ERT $> 0.125$                                                                                    |
| 3  | Salmonella spp                              | FORs    | Salmonella Resistant to Fluoroquinolones                  | Salmonella spp. CIP R                                                                                                 |
| 4  | Pseudomonas aeruginosa                      | PARC    | Pseudomonas aeruginosa Résistante à la Cefazidime         | Pseudomonas Aeruginosa Cefazidim = R                                                                                  |
| 5  | Pseudomonas aeruginosa                      | IRPA    | Ceftazidime resistant Pseudomonas aeruginosa              | Pseudomonas Aeruginosa = MER = R and/or IMI = R                                                                       |
| 6  | Acinetobacter baumannii                     | CRAB    | Acinetobacter baumannii Résistant aux Carbapénèmes        | Acinetobacter baumannii = MER = R and/or IMI = R                                                                      |
| 7  | Staphylococcus aureus                       | MRSA    | Carbapenem Resistant Acinetobacter baumannii              | Staphylococcus aureus test resistant to ceftazidim or oxacillin                                                       |
| 8  | Staphylococcus aureus                       | VRSA    | Vancomycin Resistant Staphylococcus Aureus                | Staphylococcus aureus = Vancomycin R or I or Teicoplanin = R                                                          |
| 9  | Staphylococcus spp                          | ICL     | Clindamycin Inducible                                     | ICL $> 4$                                                                                                             |
| 10 | Enterococcus spp                            | VRE     | Vancomycin Resistant Enterococci                          | Enterococcus sp = Vancomycin Resistant or Intermediate                                                                |
| 11 | Enterococcus spp                            | GmS     | High resistance to aminoglycosides                        | GmS $> 500$                                                                                                           |
| 12 | Streptococcus pneumoniae                    | PRSp    | Penicillin Resistant Streptococcus pneumoniae             | Streptococcus pneumoniae PEN = R                                                                                      |
| 13 | Haemophilus influenzae                      | ARHi    | Haemophilus influenzae influenzae resistant to Ampicillin | Haemophilus influenzae = Bêta-lactamase test positive or AMP = R                                                      |

Effective date : 10/11/2021

Version : V1

Code : FM-23-LECMIC

52

(b)

**Figure S2.** Extraction of Mini-Lab Bench aid user manual Version1 2022 with, (a) description of type of growth and (b) visual description of the identification of MIC and mechanism of resistance
